# Supplementary material for: Development of a polylactic acid-coated nanocellulose/chitosan-based film indicator for real-time monitoring of beef spoilage
Source: Royal Society of Chemistry journal article supplement (doi:10.1039/d1ay00365h), 2021-01-01
Supplement: d1ay00365h1.pdf [file d1ay00365h1.pdf]

## Supporting information

### Development of a polylactic acid-coated nanocellulose/chitosan-based film indicator for real-time monitoring beef spoilage

Abdus Sobhan<sup>a</sup>, Kasiviswanathan Muthukumarappan<sup>a</sup>, Lin Wei<sup>a\*</sup>, Ruanbao Zhou<sup>b</sup>, and Hemachand Tummala<sup>c</sup>

<sup>a</sup>*Department of Agricultural & Biosystems Engineering, South Dakota State University,*

*1400 North Campus Drive, Brookings, South Dakota 57007, United States*

<sup>b</sup>*Department of Biology and Microbiology, South Dakota State University, 1400 North Campus Drive, Brookings, SD 57007, United State*

<sup>c</sup>*Department of Pharmaceutical Sciences, South Dakota State University, 1400 North Campus Drive, Brookings, SD 57007, United State*

\*Correspondence: E-mail: Lin.Weil@sdstate.edu.; Tel: +1-605-688-4179; Fax: +1-605-688-6764.

**Contents:**

**Fig. S1.** Color variation of PLA/NCM film with respect to beef spoilage at room temperature ( $22 \pm 2^\circ\text{C}$ ).

**Fig. S2.** The color change ( $\Delta E$ ) of PLA/NCM film towards the spoiling beef at room temperature ( $22 \pm 2^\circ\text{C}$ ).

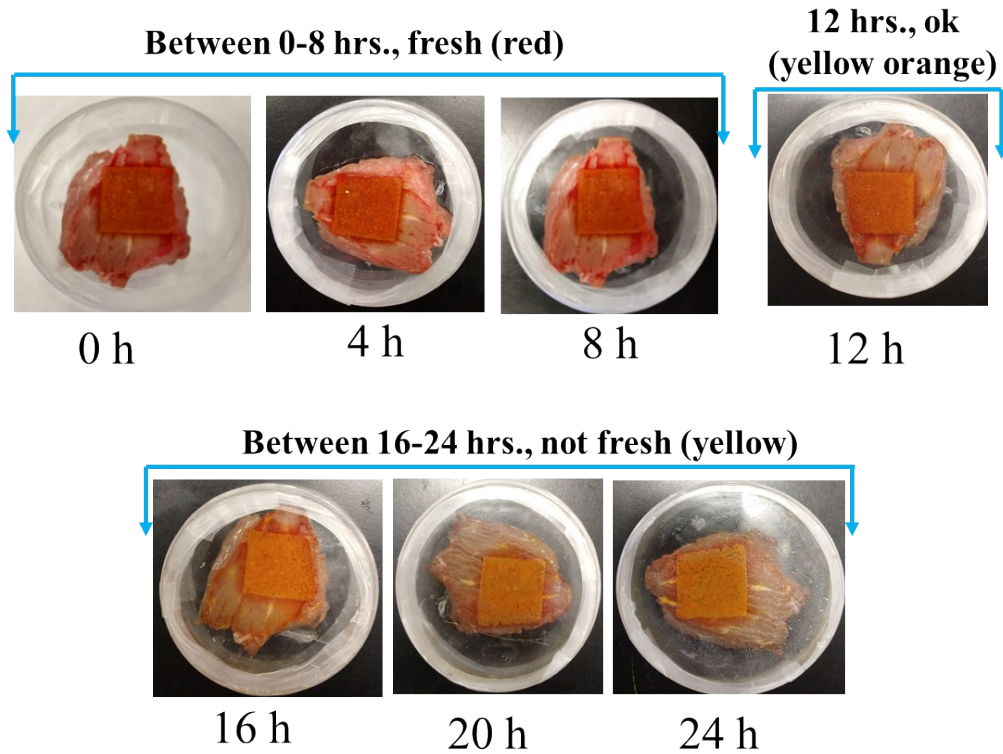

**Fig. S1.** Color variation of PLA/NCM film with respect to beef spoilage at room temperature ( $22 \pm 2^\circ\text{C}$ ).

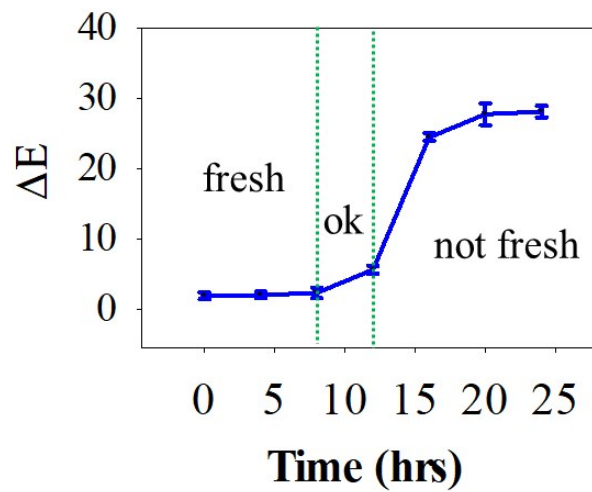

**Fig. S2.** The color change ( $\Delta E$ ) of PLA/NCM film towards the spoiling beef at room temperature ( $22 \pm 2^\circ\text{C}$ ).
